# Supplementary material
Source: publisher figshare collection journal article supplement (https://geolsoc.figshare.com/ndownloader/files/26225779)
Supplement: Supplementary file 1 [file 26225779]

## Sheet: Data
Sample	Cruise	Location	gl/wr	Rock type	Latitude(S)	Longitude (W)	water depth	Ref.#	Age		SiO2	TiO2	Al2O3	Fe2O3	FeO	MnO	MgO	CaO	Na2O	K2O	P2O5	SO3 (ab Wx58 höhere Zählrate)	Cl	LOI	Total	Alkalies	H2O	CO2	S	Li	Sc	V	Cr	Co	Ni	Cu	Zn	Ga	Rb	Sr	Y	Zr	Nb	Mo	Sn	Sb	Cs	Ba	La
Table S1. Analyses of lavas from Bransfield Strait volcanoes
22DR-01	SO155	Gibbs Rise		Leucogabbro	61.8412	55.4413	950
22DR-02	SO155	Gibbs Rise		Diorite	61.8412	55.4413	950
22DR-03	SO155	Gibbs Rise		Diabase	61.8412	55.4413	950
22DR-04	SO155	Gibbs Rise	wr	Basalt	61.8412	55.4413	950	12			54.12	0.88	17.36	7.47		0.13	5.18	9.27	3.58	0.74	0.11				98.96	4.32
22DR-06	SO155	Gibbs Rise	wr		61.8412	55.4413	950	12			49.15	1.05	17.86	11.02		0.18	5.78	9.36	3.03	0.55	0.19				99.89	3.58
22DR -07	SO155	Gibbs Rise	wr		61.8412	55.4413	950	12			55.96	0.79	16.89	7.06		0.12	5	8.61	3.39	0.72	0.12				98.66	4.11
22DR-07gl	SO155	Gibbs Rise	gl		61.8412	55.4413	950	12			62.462	1.6165	12.748		8.633	0.1368	2.306	5.124	3.765	1.651	0.3079	0.0172	0.1435		98.9526	5.416
20DR-01	SO155	Gibbs Rise	wr		61.8053	55.476	2809	12			44.39	2.57	14.87	12.12		0.14	8.63	8.02	3.58	2.09	0.69				98.84	5.67				6.62397	21.1557	185.417	204.635	47.756	171.187	44.1598	90.137		16.8905	916.838	21.9987	246.63	41.801	2.7219	1.82478	0.0789231	0.323096	184.644	32.0874
20DR-02	SO155	Gibbs Rise	wr	Microporphyric dolerite	61.8053	55.476	2809	12			55.7842	0.784177	16.741	6.64832		0.12169	4.29604	5.13079	3.74164	2.78582	0.146204				99.4599	6.52746				7.41436	19.8704	192.933	53.3955	16.2363	23.6503	67.715	73.6513	17.6814	43.901	300.86	17.5018	75.6518	2.31889	0.858906	0.724323		0.437284	441.367	11.2502
20DR-3	SO155	Gibbs Rise	wr	Microporphyric dolerite	61.8053	55.476	2809	12
20DR-7	SO155	Gibbs Rise	wr	Microporphyric dolerite	61.8053	55.476	2809	12
21DR-1	SO155	Gibbs Rise	wr	Dolerite	61.828	55.474	1560	12			57.54	0.78	17.87	6.36		0.1	4.51	7.07	3.61	0.88	0.14				98.86	4.49				13.7919	23.5267	210.282	48.1412	17.5724	17.24	135.939	57.7805	20.339	12.1767	369.794	20.2418	104.54	2.78126	0.599615	0.931752		0.868858	284.674	12.0416
21DR-2	SO155	Gibbs Rise	wr	Dolerite	61.828	55.474	1560	12
21DR-3	SO155	Gibbs Rise	wr	Dolerite	61.828	55.474	1560	12
21DR-4	SO155	Gibbs Rise	wr	Dolerite	61.828	55.474	1560	12
21DR-5	SO155	Gibbs Rise	wr	Dolerite with granite xenoliths	61.828	55.474	1560	12
21DR-6	SO155	Gibbs Rise	wr	Dolerite	61.828	55.474	1560	12
21DR-9	SO155	Gibbs Rise	wr	Altered dolerite	61.828	55.474	1560	12
23DR-2wr	SO155	Gibbs Rise	wr		61.7655	55.422	2600	12			54.1458	0.81891	18.7103	7.75171		0.0931051	2.74243	8.24609	3.12391	2.21013	0.261558				99.774	5.33404				14.8908	18.8368	207.517	4.73129	14.0806	1.90466	128.495	60.4092	18.8095	32.0522	409.329	18.7169	126.961	2.89064	0.910011	1.52222		1.54016	496.758	19.0415
23DR-05	SO155	Gibbs Rise	wr		61.7655	55.422	2600	12			54.5	0.84	19.47	6.08		0.16	1.97	8.63	3.52	2.24	0.3				99.16	5.76
23DR-10	SO155	Gibbs Rise	wr		61.7655	55.422	2600	12			53.55	0.8	18.45	7.53		0.1	2.54	8.06	3.46	1.88	0.28				99.39	5.34				6.61764	19.7382	217.157	8.01375	17.175	6.32865	147.275	67.2133		43.8873	680.139	19.4892	145.521	3.16471	1.23371	1.80977	0.305758	3.82076	495.999	20.6863
23DR-12wr	SO155	Gibbs Rise	wr		61.7655	55.422	2600	12			53.4637	0.783966	18.9497	7.04487		0.108543	2.04759	8.39082	3.01824	2.03995	0.242209				98.0696	5.05818				11.0016	18.0146	200.736	4.71167	11.1096		132.1	58.8843	19.0639	54.0496	443.995	17.7488	122.775	2.78452	1.13155	1.48159		3.51357	475.205	18.2568
								12
18DR-01	SO155	Spanish Rise			61.8828	55.9827	1542	12			51.14	0.6	15.44	7.86		0.13	10.71	9.46	2.78	0.41	0.08				98.63	3.19				4.74847	29.3575	198.332	385.778	40.9982	250.239	59.88	57.4173		9.05169	209.877	13.0058	54.2213	0.933333	0.357195	0.413034	0.0463616	0.435823	80.2057	3.55289
18DR-02	SO155	Spanish Rise			61.8828	55.9827	1542	12			51.33	0.6	15.56	7.83		0.13	10.78	9.45	2.75	0.41	0.08				99.03	3.16
18DR-06	SO155	Spanish Rise			61.8828	55.9827	1542	12			50.85	0.58	15.58	7.87		0.13	11	9.6	2.57	0.42	0.06				98.9	2.99
18DR-09	SO155	Spanish Rise			61.8828	55.9827	1542	12			51.37	0.6	15.62	7.7		0.13	10.49	9.55	2.84	0.41	0.08				99.11	3.25				5.1514	28.0837	188.039	334.366	37.5513	241.909	53.0047	54.5482		9.3195	211.567	13.2851	55.6399	0.941888	0.372501	0.603079	0.0553387	0.385951	83.6104	3.67796
18DR-10	SO155	Spanish Rise			61.8828	55.9827	1542	12			51.17	0.59	15.4	7.87		0.13	10.92	9.38	2.7	0.38	0.08				98.62	3.08
25DR-02	SO155	Spanish Rise		Basalt	61.8945	55.8217	2160	12			49.61	1.32	15.91	8.83		0.14	9.85	9.32	3.47	0.47	0.2				99.25	3.94				5.19436	38.078	244.344	445.829	43.6826	241.681	48.0889	68.7319		6.19101	248.021	25.8799	142.396	3.38366	0.59558	1.37546	0.0329617	0.139664	34.1536	6.18594
25DR-03	SO155	Spanish Rise		Basalt	61.8945	55.8217	2160	12			51	1.4	16.51	8.9		0.14	8.16	10.16	3.59	0.4	0.16				100.78	3.99
25DR-04wr	SO155	Spanish Rise		Basalt	61.8945	55.8217	2160	12			49.1205	1.87727	15.8634	10.1717		0.161981	7.70912	9.98518	3.75071	0.384614	0.249304				99.3337	4.13532				6.19689	31.8604	252.793	220.529	33.6941	103.794	53.1421	71.4106	18.4794	2.4847	252.172	35.6441	176.1	4.12558	0.775227	1.69853		0.0707557	27.4485	7.65079
25DR-04gl	SO155	Spanish Rise	gl	Basalt	61.8945	55.8217	2160	12			49.21	2.01333	16.2922		8.74667	0.165667	5.99333	10.01	4.03222	0.345556	0.364222	0.07	0.0335556		97.3175	4.37778
25DR-06	SO155	Spanish Rise	wr	Alkali basalt	61.8945	55.8217	2160	12			47.79	2.01	15.11	11.6		0.16	8.79	8.53	3.45	1.21	0.45				99.1	4.66				7.02869	23.2805	193.132	297.768	45.873	155.569	41.8471	89.8253		18.429	597.235	23.9005	178.764	29.1858	2.74314	1.91285	0.0884588	0.60892	168.459	22.1313
26DR-01	SO155	Spanish Rise	wr	Alkali basalt	61.9317	55.8832	1902	12			45.89	2.145	15.355	11.82		0.16	8.92	8.015	4.135	1.52	0.655				99.24	5.655				7.25943	19.4459	168.906	228.01	45.9654	179.242	46.5712	84.4718		14.4166	758.013	22.2141	230.471	36.6436	3.55645	1.8034	0.0710684	0.257518	160.69	28.7151
26DR-03wr	SO155	Spanish Rise	wr	Alkali basalt	61.9317	55.8832	1902	12			47.4745	1.75099	15.4232	10.668		0.146306	8.3507	8.06926	3.29021	1.45133	0.404259				98.1187	4.74153				6.93823	22.4612	183.064	290.281	37.5943	135.304	39.6237	81.6937	17.9664	14.5135	485.199	21.6231	164.102	23.1983	1.27578	1.32446		0.145471	198.946	17.9085
26DR-05	SO155	Spanish Rise	wr	Alkali basalt	61.9317	55.8832	1902	12			46	2.03	15.09	12.38		0.17	8.54	9.42	3.08	0.99	0.43				99.01	4.07				6.33593	31.7087	235.539	363.769	51.3499	137.14	52.9188	97.0243		9.61914	535.774	22.198	144.984	24.4449	1.82717	1.32607	0.0665941	0.262851	105.353	18.5022
27DR-01	SO155	Spanish Rise	wr		61.9633	55.8715	2000	12			50.35	1.49	17.28	8.45		0.14	6.37	10.9	3.69	0.39	0.18				99.24	4.08				4.50804	32.7958	233.653	153.247	30.8638	50.2969	50.6929	63.9149		4.14388	289.656	25.1637	133.322	3.07806	0.614453	1.08601	0.0400502	0.13691	30.2462	5.55888
27DR-04	SO155	Spanish Rise	wr		61.9633	55.8715	2000	12			50.735	1.48	17.01	8.55		0.135	6.13	10.49	3.56	0.39	0.19				98.67	3.95				6.20228	31.4675	225.859	143.2	29.9587	47.6573	53.6239	63.657		6.52608	281.915	24.8243	131.532	3.31853	0.564362	1.02535	0.0606547	0.343368	45.9091	6.14148
28DR-01	SO155	Spanish Rise	wr		61.9853	55.9025	2000	12			50.015	1.195	16.16	8.455		0.15	9.67	10.185	3.145	0.4	0.17				99.64	3.545				4.57205	29.8642	204.244	274.377	38.3535	168.294	57.3284	58.0974		5.72131	258.112	20.7666	108.351	2.91564	0.602506	1.24269	0.0484465	0.243788	43.9479	5.47523
28DR-02	SO155	Spanish Rise	wr		61.9853	55.9025	2000	12			50.2	1.195	16.18	8.32		0.14	9.545	10.13	3.165	0.4	0.16				99.51	3.565
28DR-04	SO155	Spanish Rise	wr		61.9853	55.9025	2000	12			50.23	1.23	16.4	8.34		0.14	9.32	10.38	3.18	0.37	0.17				99.76	3.55
28DR-10	SO155	Spanish Rise	wr		61.9853	55.9025	2000	12			48.2	1.17	16.99	10.2		0.16	7.08	8.88	3.43	0.33	0.33				100.01	3.76				4.6035	27.0801	225.233	245.157	36.1158	118.609	61.8728	79.5786		2.21435	432.721	21.0017	95.8056	5.14829	0.364972	0.679823	0.0298157	0.0390676	174.178	11.0749
								12
13DR-2wr	SO155	G Ridge	wr	Dacite	62.1127	56.5115	977	12			65.12	0.846636	11.5419	6.32176		0.0999328	3.67081	7.0169	2.13556	0.256265	0.0947296				98.7245	2.39183				4.57491	21.346	172.209	25.8489	18.5127	11.3892	31.8604	43.9871	12.2882	4.59116	238.713	15.1016	56.0881	1.33149	0.451029	0.627317		0.614247	572.654	3.38705
13DR-03	SO155	G Ridge	wr	Basalt	62.1127	56.5115	977	12			51.26	1.18	16.85	9.49		0.15	5.8	10.58	3.25	0.38	0.09				99.03	3.63				5.57099	33.3886	281.761	23.4655	32.5607	22.5793	52.5652	62.3544		8.69671	274.156	19.5843	76.0323	1.21717	0.29161	0.851334	0.0285194	0.473586	55.3247	3.75981
13DR-06	SO155	G Ridge	wr	Basalt	62.1127	56.5115	977	12			51.51	1.2	16.86	9.6		0.15	5.63	10.5	3.25	0.37	0.1				99.17	3.62
14DR-01	SO155	G Ridge	wr	Basalt	62.0693	56.3952	1330	12			47.88	1.21	17.29	9.44		0.14	7.78	12.36	2.85	0.44	0.11				99.5	3.29				4.98447	32.7018	289.581	17.7937	33.0696	21.4498	51.9993	63.0693		8.45808	274.811	19.7782	76.4945	1.21614	0.29866	0.747337	0.0322887	0.511675	54.8002	3.7482
14DR-06	SO155	G Ridge	wr	Alkali basalt	62.0693	56.3952	1330	12			47.22	1.94	15	12.22		0.17	9.1	8.74	3.74	1.21	0.44				99.78	4.95				7.17306	21.1251	187.535	277.711	48.8692	171.384	42.9031	92.8743		15.2171	539.233	21.4515	174.158	31.3926	2.47956	1.62226	0.0510353	0.280015	151.662	22.2116
15DR-01gl	SO155	G Ridge	gl		62.0405	56.3207	2068	12			50.844	1.76793	14.9573		9.87867	0.1832	5.50467	10.1473	3.20867	0.3808	0.244933	0.0352857	0.0547333		97.2481	3.58947				3.73836	33.0821	302.396	109.281	33.8676	50.1973	60.1854	63.2699		7.86119	303.571	18.757	72.8173	1.63408	0.323657	0.861837	0.0259286	0.360198	54.3468	4.44322
15DR-01	SO155	G Ridge	wr		62.0405	56.3207	2068	12			49.73	1.33	17.3	9.7		0.15	6.58	10.95	3.02	0.42	0.12				99.32	3.44
15DR-02	SO155	G Ridge	wr		62.0405	56.3207	2068	12			49.67	1.33	17.41	9.81		0.15	6.7	11.02	3	0.44	0.12				99.75	3.44
15DR-03	SO155	G Ridge	wr		62.0405	56.3207	2068	12			49.88	1.34	17.32	9.83		0.15	6.62	11	3.01	0.43	0.12				99.85	3.44
16DR-1wr	SO155	G Ridge	wr		62.0002	56.2288	2250	12			50.2729	1.1879	16.6505	8.70117		0.124597	6.48883	11.5755	2.5663	0.3922	0.132017				98.3619	2.9585				4.16771	30.3538	249.907	170.081	28.6887	43.9792	53.3773	54.6783	16.6629	7.26075	366.495	18.9814	83.3083	1.3375	0.171915	0.706839		0.222664	128.464	10.6347
16DR-02	SO155	G Ridge	wr		62.0002	56.2288	2250	12			50.54	1.19	16.79	8.75		0.13	7.11	11.55	2.72	0.48	0.15				99.87	3.2				3.72173	30.5667	242.378	167.17	32.562	57.3482	56.1296	54.9111		10.6106	398.696	18.7238	91.4677	1.37278	0.258486	0.977509	0.0344965	0.274521	131.071	11.0622
16DR-09	SO155	G Ridge	wr		62.0002	56.2288	2250	12			50.4	1.19	16.79	8.69		0.14	7.19	11.61	2.71	0.45	0.15				99.67	3.16
16DR-11	SO155	G Ridge	wr		62.0002	56.2288	2250	12			63.28	1.05	15.3	6.79		0.14	1.47	4.02	5.21	1.53	0.24				99.03	6.74				17.2243	15.9275	65.8635	1.38015	9.43939	1.02254	45.1142	81.5828		45.8797	197.63	37.0581	187.609	2.62865	0.92429	1.44224	0.146818	3.02345	242.548	12.0056
17DR-01	SO155	G Ridge	wr		61.9723	56.1645	2430	12			50.09	1.31	16.61	9.11		0.14	6.66	11.22	2.83	0.51	0.15				99.09	3.34				3.76418	32.7989	266.235	162.053	34.5867	56.5865	62.2378	59.9259		10.0843	332.069	21.6878	95.9622	1.4598	0.319923	0.980906	0.0327703	0.278862	111.558	9.48613
17DR-02	SO155	G Ridge	wr		61.9723	56.1645	2430	12			53.46	1.41	15.31	9.76		0.19	5.17	8.77	3.94	0.56	0.2				99.23	4.5				4.84544	26.5171	198.26	134.253	26.0689	44.3125	38.5621	86.37		7.82968	162.93	39.8024	155.676	2.91734	0.602861	1.43499	0.0390507	0.306487	49.7623	6.51345
17DR-06	SO155	G Ridge	wr		61.9723	56.1645	2430	12			53.92	1.62	16.14	10.51		0.16	3.66	7.79	4.42	0.34	0.15				98.93	4.76				5.71861	25.5334	253.407	30.2655	27.2713	10.5471	20.5392	72.369		4.30884	254.64	32.9861	148.322	2.15643	0.337452	1.1942	0.0233292	0.174925	90.3263	7.20992
D6D	NBP93-1	G Ridge	gl			56.6		8			51.82	0.84	13.08		8.45	0.12	7.12	12	2.55	0.39	0.06				96.43	2.94													7.4	193	15	40	0.7				0.46	53	2.45
D6G	NBP93-1	G Ridge	gl			56.6																																	12.2	380	12	42	0.6				0.53	79	2.77
P.640.1b		Bridgeman Island	wr		62.0667	56.7333		5			52.88	0.64	17.68	7.43		0.13	6.14	10.3	3.54	0.47	0.06				99.27	4.01							130		40		62		11	332	10	58						77
P.642.4		Bridgeman Island	wr		62.0667	56.7333		5			53.04	0.58	18.26	7.39		0.13	5.94	10.37	3.11	0.53	0.06				99.41	3.64							87		28		62		12	311	11	69						86
P.642.2c		Bridgeman Island	wr		62.0667	56.7333		5			54.72	0.6	18.83	6.87		0.13	5.04	9.85	3.49	0.57	0.07				100.17	4.06							67		22		64		11	319	9	76						79
P.640.3a		Bridgeman Island	wr		62.0667	56.7333		5			54.06	0.75	19.04	7.51		0.13	4.39	9.33	3.86	0.57	0.06				99.7	4.43							40		20		65		14	346	11	76						84
P.646.1		Bridgeman Island	wr		62.0667	56.7333		5			53.96	0.64	18.17	7.38		0.13	5.1	9.5	3.61	0.67	0.07				99.23	4.28							59		30		67		18	283	13	86						101
BI-01		Bridgeman Isl.			62.0667	56.7333		14			55.5993	0.701087	18.1165		6.50952	0.1138	5.24291	9.59169	3.00756	0.802694	0.314981				100						31	206	90	25	40	70	40	17	19	325	13	74						115	5
BI-02		Bridgeman Isl.			62.0667	56.7333		14			56.686	0.802064	17.9111		6.94116	0.126695	4.00521	8.43955	3.3513	0.919564	0.81739				100						28	220	30	20		70	80	18	20	315	17	86						140	8
BI-03		Bridgeman Isl.			62.0667	56.7333		14			57.0261	0.734873	18.6763		6.67851	0.108131	4.43023	8.80797	2.8975	0.524909	0.11548				100						30	177	70	24		80	70	17	6	315	19	97						157	7.6
BI-04		Bridgeman Isl.			62.0667	56.7333		14			67.7655	0.931762	15.3967		6.04682	0.0663176	2.74113	4.36591	1.93426	0.652123	0.0994763				100						25	211	50	13		40	60	15	15	254	8	76						115	5.5
BI-05		Bridgeman Isl.			62.0667	56.7333		14			54.5967	0.724179	18.3259		7.07231	0.130826	5.7481	10.2086	2.63712	0.473858	0.0824101				100						31	227	60	27		70	80	18	11	320	14	63						105	6
BI-06		Bridgeman Isl.			62.0667	56.7333		14			57.4023	1.01572	20.9139		7.41147	0.102127	4.52913	6.16095	1.83163	0.521738	0.111008				100						31	215	80	22		50	60	19	9	274	11	95						134	4.5
BI-07		Bridgeman Isl.			62.0667	56.7333		14			54.7008	0.711769	17.9666		6.99751	0.125726	5.72863	10.1594	2.90994	0.618489	0.0811133				100						31	230	60	25		40	80	17	16	318	13	58						107	5
BI-08		Bridgeman Isl.			62.0667	56.7333		14			56.1735	0.743517	16.9846		7.04516	0.126449	5.49292	9.77194	2.90326	0.667648	0.0910429				100						33	239	70	25		80	70	17	16	313	14	61						110	5.8
B1		Bridgeman Isl.			62.0667	56.7333		2			55.8	0.78	18.7		6.6	0.12	5	9.4	3.5	0.7	0.08				100.68						29	210	40		27	92	56		17	357	14	72	0.7					76
B2		Bridgeman Isl.			62.0667	56.7333		2			54.3	0.63	18.3		6.3	0.12	5	9.7	3.2	0.7	0.08				98.33						29	178	66		27	53	54		15	318	15	76						84
02DR-01wr	SO155	Bridgeman Rise	wr	Vesicular lava	62.1223	57.0167	1377	12			51.1892	0.708137	17.736	7.57477		0.122316	6.6469	12.1251	2.47095	0.444997	0.0843542				99.3327	2.91594				5.66589	31.7831	222.699	59.8858	27.1382	52.276	61.6661	51.6867	16.7626	8.67981	272.71	14.8413	50.2075	1.48404	0.245573	0.580117		0.46322	90.0927	4.17493
02DR-02	SO155	Bridgeman Rise	wr	Vesicular lava	62.1223	57.0167	1377	12			51.03	0.7	17.78	7.53		0.13	6.72	12.06	2.54	0.46	0.1				99.34	3
02DR-03	SO155	Bridgeman Rise	wr	Vesicular lava	62.1223	57.0167	1377	12			51.2	0.7	17.9	7.43		0.13	6.7	12.18	2.61	0.47	0.09				99.52	3.08
02DR-10	SO155	Bridgeman Rise	wr	Vesicular lava	62.1223	57.0167	1377	12			51.46	0.71	17.48	8.11		0.13	6.52	11.56	2.96	0.51	0.1				100.25	3.47
02DR-14gl	SO155	Bridgeman Rise	gl	Vesicular lava	62.1223	57.0167	1377	12			51.9688	0.889375	15.4875		8.1575	0.14275	6.605	11.0525	2.70125	0.598875	0.19925	0.0165	0.080375		97.9398	3.30012
03DR-01wr	SO155	Bridgeman Rise	wr		62.122	56.8988	640	12			50.2864	0.61134	15.0995	7.72632		0.126073	11.7043	10.3409	2.23176	0.274239	0.0527518				98.2636	2.506				5.15188	29.6742	183.856	378.104	39.1223	249.515	52.3743	50.2357	14.0902	5.82658	200.009	13.8293	47.9607	0.687278	0.19849	0.44439		0.340706	54.3771	2.61513
03DR-02	SO155	Bridgeman Rise	wr		62.122	56.8988	640	12			51.55	0.86	18.1	7.88		0.13	6.72	11.56	2.94	0.31	0.09				100.14	3.25				5.33977	30.7212	219.593	155.594	30.6862	67.5462	72.769	54.9568		7.62847	255.608	17.403	58.4647	0.81071	0.243369	0.494221	0.0332547	0.510379	54.2162	3.13098
03DR-05	SO155	Bridgeman Rise	wr		62.122	56.8988	640	12			58.04	0.72	16.12	6.19		0.11	4.1	6.55	5.06	1.21	0.13				98.23	6.27				5.90834	31.3781	216.976	157.566	31.0155	69.8942	75.3262	55.3076		8.15938	261.951	17.7243	60.0938	0.83949	0.262293	0.618032	0.0279197	0.454537	57.7387	3.22995
03DR-06	SO155	Bridgeman Rise	wr		62.122	56.8988	640	12			51.46	0.85	18.03	7.99		0.13	6.69	11.56	3.15	0.31	0.09				100.33	3.46
03DR-07	SO155	Bridgeman Rise	wr		62.122	56.8988	640	12			65.7	0.77	15.83	4.44		0.07	0.98	3.34	5.28	1.97	0.15				98.53	7.25				8.62059	10.0189	45.1774	1.29386	8.02514	1.68071	20.5988	46.4068		56.103	186.319	28.9889	72.8755	3.05716	0.940428	1.54087	0.05797	2.61509	286.585	13.2459
03DR-08	SO155	Bridgeman Rise	wr		62.122	56.8988	640	12			67.63	0.6	14.71	3.85		0.07	0.71	2.55	5.22	2.43	0.11				97.88	7.65				20.8522	8.49497	27.9269	0.10763	5.56821	0.890689	34.1823	53.4787		81.204	143.145	33.1441	162.639	3.54632	1.34742	2.27994	0.106136	4.67175	331.142	13.9747
03DR-09gl	SO155	Bridgeman Rise	gl		62.122	56.8988	640	12			72.3863	0.700375	12.4138		4.09375	0.090875	0.572625	1.645	3.89625	2.94375	0.166625	0.0196667	0.362375		99.3155	6.84				21.1762	14.645	78.9103	0.829521	7.47173	1.35723	28.5157	56.3213		76.1981	61.9497	46.7267	320.854	4.22315	0.955309	1.50832	0.0933022	2.57139	320.703	17.4819
03DR-10gl	SO155	Bridgeman Rise	gl		62.122	56.8988	640	12			71.135	0.69575	12.67		4.83	0.0635	0.74925	1.815	4.055	2.8575	0.19525	0.02	0.69175		99.817	6.9125
03DR-11	SO155	Bridgeman Rise			62.122	56.8988	640	12			56.71	0.86	16.94	7.79		0.14	4.14	8.34	3.73	0.96	0.13				99.74	4.69				5.71798	24.8524	208.144	85.9239	24.1396	34.2655	75.4049	76.6379		27.0441	276.305	20.09	88.1972	1.47727	0.513617	0.753664	0.0685079	1.36837	166.107	7.44417
03DR-14	SO155	Bridgeman Rise			62.122	56.8988	640	12			58.41	0.58	17.95	4.89		0.06	4.01	7.27	3.84	0.87	0.13				98.01	4.71				6.40684	16.5642	126.552	56.142	17.8479	38.3714	51.6568	44.9291		9.12656	704.868	9.96018	80.8492	1.27673	0.257743	0.422998	0.144686	0.410344	134.555	8.32077
03DR-17	SO155	Bridgeman Rise			62.122	56.8988	640	12			51.61	0.86	18.06	8.01		0.13	6.6	11.56	3.01	0.31	0.08				100.23	3.32
04DR-01	SO155	Bridgeman Rise		Andesite	62.0622	56.9662	771	12			53.42	0.8	18.88	7.84		0.12	4.76	10.13	3.22	0.47	0.08				99.72	3.69				6.33824	25.428	188.094	42.6231	27.0545	31.6398	76.624	57.8869		10.0678	335.516	16.0598	59.6769	0.867543	0.279305	1.4426	0.0418919	0.577	66.3796	3.10876
04DR-02	SO155	Bridgeman Rise		Andesite	62.0622	56.9662	771	12			53.29	0.81	18.53	7.91		0.13	4.94	10	3.22	0.46	0.08				99.37	3.68
04DR-06	SO155	Bridgeman Rise		Andesite	62.0622	56.9662	771	12			53.32	0.8	18.49	7.93		0.13	5.3	10.06	3.09	0.45	0.07				99.79	3.54
04DR-07	SO155	Bridgeman Rise		Andesite	62.0622	56.9662	771	12			53.26	0.76	18.41	7.86		0.13	5.54	10.27	3.06	0.43	0.07				100.05	3.49				5.86294	27.9584	192.624	52.3539	28.0681	34.8164	93.2648	55.6264		9.17504	321.57	14.9002	53.2256	0.842892	0.244926	0.773451	0.052967	0.541507	61.6102	2.87034
04DR-09	SO155	Bridgeman Rise		Andesite	62.0622	56.9662	771	12			57.71	1.31	16.02	9.81		0.16	2.37	6.15	4.33	0.89	0.16				99.29	5.22				10.8055	24.1388	206.353	0.398362	21.961	2.61264	59.1494	84.0697		19.5899	290.205	28.3034	117.14	1.85236	0.537525	1.30687	0.0823673	1.0995	127.499	6.42929
04DR-10	SO155	Bridgeman Rise		Andesite	62.0622	56.9662	771	12			57.94	1.3	16.08	9.91		0.16	2.48	6.19	4.46	0.87	0.15				99.85	5.33
04DR-13	SO155	Bridgeman Rise		Alkali basalt	62.0622	56.9662	771	12			46.26	2.3	16.22	10.32		0.14	7.28	7.97	4.61	2	0.93				100.36	6.61				6.31656	18.077	166.074	171.288	35.7913	106.044	37.3214	74.2725		16.0483	1111.82	21.802	246.391	57.7255	3.26973	1.84926	0.0768036	0.314317	304.306	44.1253
7GTV-1	SO155	Hook Ridge	wr	Dacite	62.1918	57.2765	1050	12			68.38	0.485	13.96	5.815		0.16	0.48	2.55	6.105	1.015	0.115				99.425	7.12				15.3468	17.6176	2.05513	0.9101	1.44349	0.405339	8.66762	113.071		20.1002	124.523	65.517	362.393	4.84367	1.26308	3.06896	0.113954	0.98148	154.017	15.5978
9MUC01	SO155	Hook Ridge	wr	Dacite	62.1918	57.2763	1050	12			67.775	0.495	13.945	5.71		0.16	0.505	2.6	6.195	1.015	0.11				99.53	7.21
38DR-01wr	SO155	Hook Ridge	wr	Dacite	62.1897	57.2443	1390	12			67.0037	0.732772	14.4947	5.0973		0.146943	0.909775	2.88054	5.51913	1.16706	0.182309				99.1143	6.68619				17.3486	9.16856	28.5298		0.858375		2.16548	88.0952	20.71	21.5162	181.22	63.1886	308.244	4.97893	1.11509	2.73531		1.05358	232.75	20.1243
38DR-02	SO155	Hook Ridge	wr	Dacite	62.1897	57.2443	1390	12			67.35	0.61	14.52	4.85		0.14	0.93	2.76	5.9	1.18	0.19				98.43	7.08
40DR-2	SO155	Hook Ridge	wr	Dacite	62.1903	57.277	1063	12			67.23	0.47	13.75	5.07		0.14	0.44	2.39	5.32	1.38	0.12				99.42	6.7
40DR-3	SO155	Hook Ridge	wr	Dacite	62.1903	57.277	1063	12			68.76	0.48	14.22	4.56		0.1	0.33	2.36	6.28	1.09	0.11				99.78	7.37
87-V2	PS47	Hook Ridge		Dacite				13			66.74	0.47	13.96	6.08		0.14	0.4	2.61	6.23	0.98	0.13				97.74						13	2.5	5	2.7	29	15	89	22	19	135	74	353	4.1					161	17.7
87-V3	PS47	Hook Ridge		Dacite				13			67.8	0.48	14.8	5.99		0.14	0.37	2.6	6.1	1.01	0.11				99.4						13	2.5	5	1.6	15	14	77	23	21	138	75	387	4.4					179	17.4
87-V5	PS47	Hook Ridge		Dacite				13			67.25	0.47	14.8	5		0.14	0.36	2.56	6.08	0.93	0.1				97.69						13	2.5	5	1.2	19	10	44	22	21	141	75	385	4.4					180	18.3
W292.17	ANT IV/2	W Hook Ridge		Western Seamount	62.205	57.505		10			49.15	1.12	13.73	8.49		0.16	12.95	10.06	2.63	0.4	0.16				98.85						37	243	688		312	78	62		12	244	20	90	2
W292.18	ANT IV/2	W Hook Ridge		Western Seamount	62.205	57.505		10			49.51	1.13	14.1	8.6		0.16	12.34	10.37	2.73	0.46	0.16				99.56						35	256	618		283	68	63		10	255	23	93	2
W292.24	ANT IV/2	W Hook Ridge		Western Seamount	62.205	57.505		10			51.43	1.34	16.34	8.6		0.16	7.51	11.21	3.31	0.46	0.17				100.53						29	302	217		92	78	64		11	271	23	96	3
W292.33	ANT IV/2	W Hook Ridge		Western Seamount	62.205	57.505		10			49.86	1.13	14.21	8.41		0.16	12.59	10.4	2.86	0.44	0.16				100.22						35	256	654		295	82	67		13	250	20	90	1
W310.01	ANT IV/2	W Hook Ridge		Western Seamount	62.215	57.48		10			50.35	1.54	16.34	9.04		0.16	6.98	10.86	3.22	0.48	0.2				99.17						35	319	195		83	72	69		9	268	27	102	4
W310.02	ANT IV/2	W Hook Ridge		Western Seamount	62.215	57.48		10			49.4	1.45	15.52	9.09		0.16	8.61	10.57	2.99	0.46	0.17				98.42						34	306	309		129	76	76		8	246	25	96	3
W310.07	ANT IV/2	W Hook Ridge		Western Seamount	62.215	57.48		10			50.37	1.54	16.34	9.01		0.16	6.65	10.87	3.4	0.55	0.19				99.08						32	328	192		80	76	69		10	266	26	104	4
W310.13	ANT IV/2	W Hook Ridge		Western Seamount	62.215	57.48		10			49.43	1.45	15.4	9.23		0.17	8.71	10.47	3.02	0.46	0.17				98.51						34	312	305		134	68	68		10	248	25	99	4
W310.26	ANT IV/2	W Hook Ridge		Western Seamount	62.215	57.48		10			51.06	1.58	16.71	8.69		0.16	6.55	10.98	3.4	0.53	0.2				99.86						33	327	167		66	81	70		10	270	27	104	3
E297.01	ANT IV/2	SE Hook Ridge		Eastern Seamount (Hook Ridge)	62.2567	57.4083		10			52.52	1.05	16.86	7.08		0.14	7.04	11.34	3.04	0.39	0.12				99.58						31	220	228		84	54	56		7	280	21	94	2
E297.02	ANT IV/2	SE Hook Ridge		Eastern Seamount (Hook Ridge)	62.2567	57.4083		10			51.86	1.02	16.86	7.18		0.14	7.46	11.11	2.9	0.38	0.12				99.03						31	218	206		87	53	56		7	274	22	91	4
E297.05	ANT IV/2	SE Hook Ridge		Eastern Seamount (Hook Ridge)	62.2567	57.4083		10			54.78	1.59	15.98	9.18		0.16	3.66	7.46	4.11	0.92	0.25				98.09						26	290	10		9	45	80		20	380	35	161	4
E300.02	ANT IV/2	SE Hook Ridge		Eastern Seamount (Hook Ridge)	62.235	57.3917		10			54.44	1.71	15.28	10.62		0.18	3.82	7.84	4.51	0.58	0.23				99.21						26	347	5		4	62	82		11	301	37	143	4
E300.13	ANT IV/2	SE Hook Ridge		Eastern Seamount (Hook Ridge)	62.235	57.3917		10			52.73	1.33	16.24	9.14		0.17	5.23	9.61	3.72	0.56	0.16				98.89						35	275	10		16	71	71		10	284	31	116	3
E300.16	ANT IV/2	SE Hook Ridge		Eastern Seamount (Hook Ridge)	62.235	57.3917		10			53	1.36	16.08	8.9		0.16	5.08	9.36	3.72	0.52	0.18				98.36						33	264	18		15	69	73		11	277	31	116	3
E300.19	ANT IV/2	SE Hook Ridge		Eastern Seamount (Hook Ridge)	62.235	57.3917		10			53.71	1.67	15.77	9.66		0.17	4	7.87	4.15	0.74	0.24				97.98						28	336	7		3	79	91		14	297	34	138	2
E300.21	ANT IV/2	SE Hook Ridge		Eastern Seamount (Hook Ridge)	62.235	57.3917		10			53.46	1.32	16.42	8.78		0.16	5.44	9.58	3.82	0.47	0.17				99.62						34	264	24		19	58	69		10	282	30	113	1
E309.01	ANT IV/2	SE Hook Ridge		Eastern Seamount (Hook Ridge)	62.2233	57.4767		10			54.28	1.7	15.68	10.12		0.17	3.71	7.4	4.23	0.97	0.23				98.49						30	351	8		3	70	92		17	330	37	154	4
D7A	NBP93-1	Hook Ridge	gl			57.08																																	5.5	277	16	48	0.7				0.29	44	2.5
D7F	NBP93-1	Hook Ridge	gl			57.08		8			54.95	0.85	15.38		8.68	0.11	5.45	10	3.11	0.52	0.1				99.15														8.2	237	17	58	1				0.48	67	3.32
D8F	NBP93-1	Hook Ridge	gl			57.1		8			50.52	1.23	16.45		8.15	0.14	6.73	10.98	3.01	0.32	0.13				97.66														7.2	190	25	82	1.5				0.38	57	3.92
D11.2	NBP95-7	Hook Ridge	gl			57.3		8			76.19	0.39	12.06		4.79	0.11	0.15	1.79	3.52	1.22	0.1				100.32
D11.3	NBP95-7	Hook Ridge	gl			57.3		8			78.05	0.34	11.01		4.27	0.11	0.11	1.02	3.04	1.06	0.06				99.07
D12.3	NBP95-7	Hook Ridge	gl			57.3		8			78.63	0.3	11.27		4.12	0.11	0.12	1.22	3.02	1.37	0.08				100.24
D7B	NBP93-1	Hook Ridge	gl			57.08		8			54.76	1.36	14.69		10.44	0.16	4.58	8.92	3.55	0.57	0.12				99.15
D7E	NBP93-1	Hook Ridge	gl			57.08		8			53.79	1.09	15.36		9.54	0.16	5.07	9.59	3.4	0.53	0.1				98.63
D7H	NBP93-1	Hook Ridge	gl			57.08		8			53.28	1.29	14.73		10.32	0.16	4.45	8.81	3.52	0.57	0.13				97.26
D7O	NBP93-1	Hook Ridge	gl			57.08		8			52.71	1	15.28		8.84	0.16	5.58	10.41	3.17	0.45	0.09				97.69
D1A	NBP93-1	Three Sisters, Bransfield St.	gl			58.8		8			57.56	1.49	15.08		9.52	0.22	3.7	6.85	4.5	0.51	0.31				99.74														3.5	174	60	272	6				0.27	38	9.52
D1F	NBP93-1	Three Sisters, Bransfield St.	gl			58.8		8			53.99	1.81	14.82		10.12	0.17	4.58	8.84	4.09	0.38	0.29				99.09														3.3	192	47	207	5.1				0.24	35	7.92
D1J	NBP93-1	Three Sisters, Bransfield St.	gl			58.8		8			54.21	1.89	14.76		10.43	0.13	4.16	8.15	4.15	0.43	0.33				98.64														4.1	199	53	235	5.9				0.23	38	8.95
D1N	NBP93-1	Three Sisters, Bransfield St.	gl			58.8		8			52.24	1.82	15.02		10.45	0.19	5.35	9.63	3.74	0.23	0.2				98.87														3.6	220	36	142	3.2				0.12	29	5.35
D144.1	JCRoss	Three Sisters, Bransfield St.	wr			59		8			70.28	0.35	12.89		4.45	0.13	0.12	1.26	7.39	1.42	0.01				98.3														15	22	153	998	18				1.2	125	28
D144.4	JCRoss	Three Sisters, Bransfield St.	wr			59		8			50.06	1.47	17.08		8.69	0.16	6.4	10.71	3.83	0.32	0.17				98.89														4.6	297	31	124	3.7				0.24	71	5.81
DF32	NBP93-1	Three Sisters, Bransfield St.				59.1					54.79	2.18	14.2		10.78	0.2	4.4	8.07	3.99	0.43	0.33				99.37														3.9	196	53	230	5.7				0.3	45	8.37
DF32	NBP93-1	Three Sisters, Bransfield St.	gl			59.1		8			54.79	2.18	14.2		10.78	0.2	4.4	8.07	3.99	0.43	0.33				99.37
D1B	NBP93-1	Three Sisters, Bransfield St.	gl			58.8		8			55.14	1.46	15.17		9.39	0.2	4.47	8.26	4.29	0.4	0.3				99.08
D1I	NBP93-1	Three Sisters, Bransfield St.	gl			58.8		8			55.84	1.34	15.46		8.84	0.17	4.48	8.27	4.51	0.43	0.27				99.61
D10A	NBP93-1	Orca Smt.	gl			58.1		8			51.2	1.14	15.59		7.95	0.1	6.62	11.8	2.74	0.63	0.29				98.06														10	223	15	61	1.6				0.34	138	6.67
D10J	NBP95-7	Orca Smt.	gl			58.1		8			52.13	1.09	15.85		8.32	0.12	6.14	11.48	2.91	0.67	0.24				98.95
D2G	NBP93-1	Orca Smt.	gl			58.4		8			49.63	1.33	16.5		9.01	0.1	7.58	11.66	3.03	0.15	0.13				99.12														1.6	204	30	106	2.4				0.09	20	4.02
D2J	NBP93-1	Orca Smt.	gl			58.4		8			59.92	1.67	15.07		9.44	0.21	2.15	5.16	4.59	0.76	0.47				99.44														8.6	163	82	407	10.9				0.46	95	16.57
D2N	NBP93-1	Orca Smt.	gl			58.4																																	4.2	213	55	226	7				0.28	58	9.39
D3C	NBP93-1	Orca Smt.	gl			58.4		8			51.12	1.54	14.78		9.68	0.11	5.86	10.46	3.58	0.28	0.18				97.59														3.2	219	34	127	3.6				0.18	39	5.23
D4D	NBP93-1	Orca Smt.	gl			58.4		8			52.4	2.13	13.93		11.77	0.19	4.89	8.99	4.02	0.37	0.24				98.93														3.6	219	44	175	4.8				0.22	47	7.06
D2A	NBP93-1	Orca Smt.	gl			58.4		8			53.47	2.2	14.24		11.88	0.17	4.13	8.19	4.29	0.44	0.31				99.32
D2B	NBP93-1	Orca Smt.	gl			58.4		8			56.39	2.18	14.81		11.29	0.17	3.21	6.56	4.29	0.6	0.43				99.93
D2E	NBP93-1	Orca Smt.	gl			58.4		8			54.46	2.28	13.67		12.36	0.16	3.72	6.96	4.16	0.54	0.39				98.7
D3D	NBP93-1	Orca Smt.	gl			58.4		8			52.12	2.72	13.56		13.04	0.2	3.71	7.9	4.03	0.43	0.35				98.06
D4F	NBP93-1	Orca Smt.	gl			58.4		8			53.78	2.78	13.64		12.79	0.17	3.87	7.68	3.97	0.5	0.35				99.53
D145.3	JCRoss	Edifice A, Bransfield St.	wr			59.65		8			51.5	1.39	17		8.5	0.16	5.85	10.61	3.91	0.37	0.16				99.45														2.9	352	25	112	4				0.26	66	6.53
D146.1	JCRoss	Edifice A, Bransfield St.	wr			59.75		8			50.97	1.57	17.38		8.37	0.16	5.94	10.42	3.88	0.32	0.18				99.19														2.2	324	30	130	3.6				0.1	46	6.59
D156.4	JCRoss	Edifice A, Bransfield St.	wr			60		8			50.02	1.5	17.59		8.21	0.15	6.34	11.12	3.68	0.34	0.2				99.15														2.7	376	27	139	5				0.18	60	7.92
PD89.4.7	JCRoss	Edifice A, Bransfield St.				59.55																																	3.8	244	48	256	5.5				0.22	61	10.3
PC7	JCRoss	Edifice A, Bransfield St.	gl					8			54.8	1.85	15.59		9.76	0.15	4.21	8.08	4.63	0.52	0.28				99.87
D13.1	NBP95-7	Edifice A, Bransfield St.	gl			59.4		8			54.41	1.74	15.86		7.81	0.14	3.67	9.31	4.65	0.55	0.35				98.49
D13.4	NBP95-7	Edifice A, Bransfield St.	gl			59.4		8			75.14	0.49	11.8		5.76	0.16	0.19	1.75	2.95	1.16	0.07				99.47
13		Deception Island		Pyroclastic dep.		60.6		3	1912		54.48	1.83	17.15	10.6015			2.86	6.05	4.45	0.91	0.32				98.6515
10		Deception Island		Pyroclastic dep.		60.6		3	1917		53.1	1.81	17.34	10.2515			3.34	7.56	4.45	0.81	0.29				98.9515
B.276.1		Deception Island		Island Centre		60.6		1	1967		61.5	1.27	15.84	7.36		0.17	1.73	4.15	6.28	1.24	0.42				99.96							55	25	30	10				17	270	46	370						250
B.428.1		Deception Island		Land Centre		60.6		1	1967		57.4	1.9	15.87	9.16		0.18	2.74	5.78	5.6	0.96	0.36				99.95										11				15	340	41	305
D-15b		Deception Island		andesitic bomb		60.6		3	1967		57.45	1.91	15.88	8.72281		0.16	2.78	5.42	6.5	1	0.46				100.283
D-7		Deception Island		andesitic pumice		60.6		3	1967		58.06	2.02	15.82	8.98337		0.18	3.13	5.4	6.4	1.03	0.4				101.423
D-1		Deception Island		andesitic ash		60.6		3	1967		59.51	1.45	15.32	7.20787		0.16	2.14	3.93	7	1.2	0.44				98.3579
B.560.1		Deception Island		N Pendulum Cove		60.6		1	1969		59.1	1.73	16	8.25		0.18	2.3	5.23	5.72	1.04	0.41				99.96
B.571.1		Deception Island		Pendulum Cove		60.6		1	1969		54.4	2.05	15.96	10.6		0.17	3.64	7.19	4.98	0.72	0.29				100							275	30	26	15				9	320	33	210						185
B.568.3		Deception Island		W Mount Pond		60.6		1	1969		54.8	2.03	15.92	10.2		0.17	3.64	7.26	4.98	0.75	0.278				100.028
B.567.1		Deception Island		W Mount Pond		60.6		1	1969		54.9	2.01	15.6	10.1		0.17	3.42	6.87	5.88	0.76	0.29				100
B.561.1		Deception Island		W Mount Pond		60.6		1	1969		55.8	1.98	15.8	9.85		0.17	3.25	6.56	5.33	0.85	0.36				99.95
B.556.1		Deception Island		SW Mount Pond		60.6		1	1969		56.1	1.97	15.9	9.76		0.17	3.12	6.46	5.35	0.85	0.34				100.02							195	25	26	13				12	335	38	310						180
B.710.1		Deception Island		Cross Hill		60.6		1	1970		59.2	1.61	15.9	8.27		0.17	2.31	5.04	5.94	1.1	0.42				99.96
B.701.2		Deception Island		Crater1		60.6		1	1970		59.3	1.61	15.8	8.24		0.18	2.34	5.06	5.92	1.08	0.41				99.94
B.702.1		Deception Island		Crater2		60.6		1	1970		59.1	1.61	15.9	8.18		0.17	2.41	4.99	6.13	1.08	0.4				99.97
B.704.1		Deception Island		Crater3		60.6		1	1970		59.1	1.64	16	8.19		0.17	2.38	5.14	5.87	1.07	0.42				99.98
B.711.1		Deception Island		Crater5		60.6		1	1970		58.8	1.74	15.78	8.52		0.18	2.44	5.22	5.85	1.02	0.41				99.96							57	25	29	10				14	305	42	305						195
B.707.1		Deception Island		Crater cluster		60.6		1	1970		57.8	1.9	15.85	9.02		0.18	2.71	5.71	5.44	0.98	0.37				99.96														13	320	40	305
1048 (age from Lawver et al.. 1995)		Deception Island				60.6		2	105000		50.9	1.58	17.3			0.15	6.1	10.3	4.1	0.47	0.25				91.15						32	245	106		28	31	66		7	465	26	143	7.1					40
B.802.1(3.91wt% H2O!)		Deception Island		Tuff; 0.5km S Arg. Station		60.6		3	Post-Caldera		53.18	1.83	16.87	9.88		0.17	4.56	8.12	4.4	0.7	0.29				100
B.763.4		Deception Island		Late post-caldera tuff cones		60.6		4	Late post-caldera		54.31									0.73	0.34
B.766.5		Deception Island		Late post-caldera tuff cones		60.6		4	Late post-caldera		59.37									1.08	0.44
B.767.1		Deception Island		Late post-caldera tuff cones		60.6		4	Late post-caldera		59.59									1.07	0.44
B.770.2		Deception Island		Late post-caldera tuff cones		60.6		4	Late post-caldera		58.75									1.02	0.42
B.780.13		Deception Island		Late post-caldera tuff cones		60.6		4	Late post-caldera		52.18									0.48	0.28
B.785.2		Deception Island		Late post-caldera tuff cones		60.6		4	Late post-caldera		52.58									0.5	0.27
B.789.9		Deception Island		Late post-caldera tuff cones		60.6		4	Late post-caldera		56.05									0.88	0.25
B.789.13		Deception Island		Late post-caldera tuff cones		60.6		4	Late post-caldera		51.96									0.54	0.3
B.795.12		Deception Island		Late post-caldera tuff cones		60.6		4	Late post-caldera		53.71									0.61	0.41
B.799.1A		Deception Island		Late post-caldera tuff cones		60.6		4	Late post-caldera		56.3									0.87	0.34
B.799.5		Deception Island		Late post-caldera tuff cones		60.6		4	Late post-caldera		55.75									0.87	0.33
B.800.7		Deception Island		Late post-caldera tuff cones		60.6		4	Late post-caldera		56.13									0.93	0.33
B.801.2		Deception Island		Late post-caldera tuff cones		60.6		4	Late post-caldera		55.82									0.94	0.33
B.809.5		Deception Island		Late post-caldera tuff cones		60.6		4	Late post-caldera		57.9									1.03	0.38
B.753.9		Deception Island		Post-caldera Strombolian fissure vents		60.6		4	post-caldera		53.39									0.69	0.36
B.758.2		Deception Island		Post-caldera Strombolian fissure vents		60.6		4	post-caldera		51.71									0.5	0.35
B.771.2		Deception Island		Post-caldera Strombolian fissure vents		60.6		4	post-caldera		49.73									0.46	0.27
B.773.1		Deception Island		Post-caldera Strombolian fissure vents		60.6		4	post-caldera		52.83									0.6	0.31
B.775.4B		Deception Island		Post-caldera Strombolian fissure vents		60.6		4	post-caldera		55.13									0.77	0.31
B.777.1		Deception Island		Post-caldera Strombolian fissure vents		60.6		4	post-caldera		53.77									0.63	0.29
B.779.4B		Deception Island		Post-caldera Strombolian fissure vents		60.6		4	post-caldera		49.3									0.45	0.26
B.779.5		Deception Island		Post-caldera Strombolian fissure vents		60.6		4	post-caldera		51.27									0.59	0.36
B.787.5		Deception Island		Post-caldera Strombolian fissure vents		60.6		4	post-caldera		53.01									0.54	0.26
B.791.14		Deception Island		Post-caldera Strombolian fissure vents		60.6		4	post-caldera		50.34									0.46	0.27
B.797.1B		Deception Island		Post-caldera Strombolian fissure vents		60.6		4	post-caldera		55.59									0.77	0.32
B.799.9		Deception Island		Post-caldera Strombolian fissure vents		60.6		4	post-caldera		54.85									0.78	0.3
B.799.11		Deception Island		Post-caldera Strombolian fissure vents		60.6		4	post-caldera		54.35									0.76	0.47
B.803.4		Deception Island		Post-caldera Strombolian fissure vents		60.6		4	post-caldera		52.48									0.55	0.28
B.804.2		Deception Island		Post-caldera Strombolian fissure vents		60.6		4	post-caldera		54.12									0.76	0.37
B.805.1		Deception Island		Post-caldera Strombolian fissure vents		60.6		4	post-caldera		51.08									0.54	0.42
B.760.30		Deception Island		Early post-caldera tuff cones		60.6		4	early post-caldera		52.1									0.41	0.29
B.783.2		Deception Island		Early post-caldera tuff cones		60.6		4	early post-caldera		54.57									0.71	0.37
B.792.1		Deception Island		Early post-caldera tuff cones		60.6		4	early post-caldera		52.83									0.54	0.28
B.808.2		Deception Island		Early post-caldera tuff cones		60.6		4	early post-caldera		51.18									0.53	0.37
B.809.2		Deception Island		Early post-caldera tuff cones		60.6		4	early post-caldera		50.89									0.51	0.38
B.803.4(12wt% H2O!)		Deception Island		Outer Coast Tuff. 1km S Arg.Station		60.6		3	Pre-Caldera		53.98	1.61	16.77	9.17		0.16	4.32	7.9	5.08	0.72	0.29				100																						0.95	674.2
B.809.1(12wt% H2O!)		Deception Island		Outer Coast Tuff. S end Stonethrow Ridge		60.6		3	Pre-Caldera		49.92	1.69	18.54	9.61		0.16	6.28	8.84	4.16	0.54	0.26				100																						0.95	675
B.751.5A		Deception Island		Pre-caldera volcanic rocks		60.6		4	Pre-caldera		51.95									0.35	0.2
B.751.6B		Deception Island		Pre-caldera volcanic rocks		60.6		4	Pre-caldera		52.72									0.5	0.28
B.751.7		Deception Island		Pre-caldera volcanic rocks		60.6		4	Pre-caldera		52.55									0.5	0.27
B.754.10		Deception Island		Pre-caldera volcanic rocks		60.6		4	Pre-caldera		51.57									0.25	0.22
B.786.4		Deception Island		Pre-caldera volcanic rocks		60.6		4	Pre-caldera		50.77									0.35	0.19
B.786.6		Deception Island		Pre-caldera volcanic rocks		60.6		4	Pre-caldera		51.56									0.59	0.35
B.791.12		Deception Island		Pre-caldera volcanic rocks		60.6		4	Pre-caldera		50.87									0.42	0.25
B.806.2		Deception Island		Pre-caldera volcanic rocks		60.6		4	Pre-caldera		52.81									0.58	0.35
B.806.6		Deception Island		Pre-caldera volcanic rocks		60.6		4	Pre-caldera		53.07									0.55	0.32
1049		Deception Island				60.6		2	pre/post caldera		52.7	2.09	15.9	10.6742		0.18	4.3	8.5	4.8	0.59	0.37				100.104						29	290	15		6	10	78		9	381	37	184	7.8					61
1050		Deception Island				60.6		2	pre/post caldera		60	1.68	16	8.65169		0.17	2.3	5.3	6.1	1.04	0.41				101.652						18	120	0		3	19	86		17	327	46	270	11.6					151
1051		Deception Island				60.6		2	pre/post caldera		51.6	2.44	15.2	12.3596		0.19	4.9	9.1	4.7	0.5	0.36				101.35						37	336	44		14	47	81		5	350	36	171	7.6					29
1055		Deception Island				60.6		2	pre/post caldera		68.9	0.6	14.5	4.83146		0.15	0.3	1.8	7.2	1.89	0.12				100.291						11	13	0		9	8	87		30	130	62	444	15.6					256
1057		Deception Island				60.6		2	pre/post caldera		69.2	0.59	14.8	4.94382		0.15	0.3	1.8	7.3	1.9	0.12				101.104						10	0	0		9	5	88		31	131	62	446	16.1					244
1060		Deception Island				60.6		2	pre/post caldera		57.8	1.86	15.6	9.66292		0.17	2.6	6	5.9	0.96	0.37				100.923						20	194	9		1	54	85		14	325	43	249	10.3					130
1063		Deception Island				60.6		2	pre/post caldera		52.8	2.31	15.4	12.1348		0.19	4.3	8.6	4.9	0.53	0.53				101.695						32	304	10		5	25	81		5	344	36	175	7.2					21
1065		Deception Island				60.6		2	pre/post caldera		52.3	2.31	15.2	11.9101		0.19	4.4	8.6	4.6	0.54	0.34				100.39						31	294	11		5	35	87		8	340	37	180	9.1					35
1066		Deception Island				60.6		2	pre/post caldera		59.9	1.6	15.8	8.20225		0.17	2.1	5.1	6.2	1.08	0.44				100.592						23	113	1		6	12	83		17	318	47	276	12.5					148
1067		Deception Island				60.6		2	pre/post caldera		61.7	1.29	15.8	7.52809		0.17	1.6	4.3	6.6	1.22	0.45				100.658						18	83	1		3	14	87		19	290	51	311	12.9					188
1075		Deception Island				60.6		2	pre/post caldera		63.9	1.12	15.6	7.52809		0.17	1.2	3.6	6.7	1.43	0.42				101.668						17	50	2		7	17	90		21	254	56	355	13.6					167
1079		Deception Island				60.6		2	pre/post caldera		69	0.63	14.8	5.05618		0.15	0.4	1.9	7.3	1.88	0.13				101.246						10	17	0		8	8	89		32	136	62	443	16.3					259
1081		Deception Island				60.6		2	pre/post caldera		54.2	1.81	16.3	10.3371		0.17	4.7	8.8	4.8	0.57	0.29				101.977						30	270	48		13	42	75		7	372	33	169	8.2					61
1082		Deception Island				60.6		2	pre/post caldera		53.8	1.82	16.2	10.1124		0.17	4.6	8.9	4.4	0.51	0.29				100.802						35	265	42		14	30	77		9	374	33	167	6.7					62
1084		Deception Island				60.6		2	pre/post caldera		56.7	1.85	15.1	10		0.17	3.1	6.6	5.4	0.87	0.31				100.1						24	243	6		8	57	82		12	333	43	236	8.7					111
1085		Deception Island				60.6		2	pre/post caldera		56.4	1.82	15.6	9.66292		0.17	3.1	6.6	5.1	0.91	0.32				99.6829						28	228	8		12	54	85		15	335	40	239	9.4					105
1087		Deception Island				60.6		2	pre/post caldera		53.7	1.82	16.2	9.88764		0.17	4.6	8.9	4.6	0.55	0.29				100.718						32	267	43		14	33	72		10	371	29	166	6.7					54
1088		Deception Island				60.6		2	pre/post caldera		59.7	1.28	15.5	7.86517		0.13	4.2	8.3	3.9	0.53	0.21				101.615						24	191	73		29	50	59		8	364	25	143	5.3					47
1092		Deception Island				60.6		2	pre/post caldera		54.2	1.59	16.9	8.98876		0.16	4.7	9.3	4.5	0.51	0.24				101.089						30	225	48		18	59	66		6	409	29	153	5.7					41
B.814.1(12wt% H2O!)		Deception Island		Pyroclastic flow; Fumarole Bay		60.6		3	Syn-Caldera		51.33	1.47	18.57	8.67		0.15	5.39	10	3.6	0.59	0.23				100
B.825.1(12wt% H2O!)		Deception Island		Pyroclastic flow; Cathedral Crags/SE Point		60.6		3	Syn-Caldera		53.81	1.76	16.42	9.98		0.17	4.4	8.34	4.13	0.79	0.29				100.09
DI-6A		Deception Island		Syn-caldera (Outer Coast Tuff Fm.)				11			52.24	1.742	16.45		8.78	0.161	4.94	9.11	4.18	0.5	0.268			0.33	98.38						31.9	248	60		23	52	75	17	6.1	391	30.46	164	5.34				0.39	88	10.26
DI-29		Deception Island		Syn-caldera (Outer Coast Tuff Fm.)				11			52.7	1.914	16.14		9.19	0.175	4.21	8.36	4.55	0.58	0.29			0.86	98.13						29.4	251	16		14	43	85	21	5.9	360	36.69	199	5.62				0.31	89	11.32
DI-31		Deception Island		Syn-caldera (Outer Coast Tuff Fm.)				11			55.64	1.448	16.17		7.42	0.157	3.89	6.91	5.14	0.87	0.254			1.67	97.89						24.7	178	22		14	52	82	20	12.7	343	38.06	253	7.09				0.59	112	13.88
DI-33		Deception Island		Syn-caldera (Outer Coast Tuff Fm.)				11			49.96	1.622	18.92		8.42	0.148	6.38	10.7	3.73	0.44	0.275			0.13	100.6						28.9	215	125		43	41	66	17	3.1	449	25.26	148	6.75				0.13	58	9.46
DI-34		Deception Island		Syn-caldera (Outer Coast Tuff Fm.)				11			49.55	1.617	18.64		8.21	0.147	6.33	10.56	3.69	0.48	0.266			0.12	99.5						29.3	215	125		44	40	65	18	3.7	442	25.45	149	6.9				0.15	59	9.63
DI-35		Deception Island		Syn-caldera (Outer Coast Tuff Fm.)				11			54.07	1.284	17.92		7.12	0.141	4.6	9.13	4.28	0.6	0.214			-0.06	99.37						26.2	179	86		33	68	68	20	7.4	400	30.44	185	5.13				0.38	91	10.62
DI-36		Deception Island		Syn-caldera (Outer Coast Tuff Fm.)				11			54.49	1.347	17.21		7.35	0.147	4.35	8.45	4.57	0.67	0.228			-0.12	98.8						26.3	182	59		28	86	74	19	8.4	390	33.14	207	5.66				0.45	99	11.74
DI-37		Deception Island		Syn-caldera (Outer Coast Tuff Fm.)				11			48.56	1.71	17.32		8.33	0.149	5.67	9.67	3.85	0.45	0.276			2.68	95.99						28.9	226	104		27	37	65	18	3.5	412	28.01	162	6.88				0.23	60	10.27
DI-50		Deception Island		Syn-caldera (Outer Coast Tuff Fm.)				11			50	1.814	15.93		9.17	0.17	5.25	9.89	3.87	0.34	0.26			2.91	96.7						35.1	278	65		25	67	80	18	2.1	419	32.09	172	4.16				0.08	62	9.05
DI-52		Deception Island		Syn-caldera (Outer Coast Tuff Fm.)				11			51.41	1.613	17.12		8.37	0.156	5.59	9.97	4.04	0.47	0.241			-0.11	98.97						33.1	233	103		30	62	73	20	4.8	433	28.13	147	4.14				0.23	71	9.38
DI-53		Deception Island		Syn-caldera (Outer Coast Tuff Fm.)				11			49.43	1.743	15.38		8.79	0.163	5.02	10	4.06	0.32	0.252			5.66	95.14						32.9	262	63		24	66	76	17	2.5	408	30.48	163	4.04				0.17	60	8.72
D2		Deception Island				60.6		2																															20.3	274.4							1.21	207.4	21.9
D9		Deception Island				60.6		2																															34.4	128							0.74	262	23.7
D10		Deception Island				60.6		2																															5	417.8							0.17	77.4	10
1048		Deception Island				60.6		2																																							0.21	80.8	10
1060		Deception Island				60.6		2																																							0.7	165.7	16.6
OG.232(1)		Deception Island		aphyric basaltic andesite; N Cross Hill		60.6		3			49.72	1.5	17.91	8.8756		0.18	6.1	10.64	3.77	0.5	0.33				99.5256
2		Deception Island		doleritic basalt		60.6		3			49.84	1.32	19.37	6.7338			4.71	12.35	2.5	0.87	0.11				97.8038
OG.229		Deception Island		basaltic andesite		60.6		3			50.18	1.54	17.75	8.9584		0.14	6.68	9.19	3.92	0.49	0.34				99.1884
OG.356		Deception Island		aphyric basaltic andesite; Macaroni Point		60.6		3			50.63	1.67	17.59	8.4582		0.17	5.56	10.22	4.12	0.44	0.29				99.1482
B.163.1		Deception Island		Ol-basalt; Stonethrow Ridge		60.6		3			50.65	1.78	17.67	8.365		0.16	5.82	10.14	4.1	0.52	0.3				99.505
OG.244		Deception Island		basaltic andesite + ol; Pendulum Cove		60.6		3			52.42	2.26	16.31	10.6608		0.3	3.6	7.64	5.25	0.61	0.48				99.5308
8		Deception Island		basaltic andesite		60.6		3			52.93	2.29	15.86	10.6889		0.11	3.63	7.6	5.03	0.64	0.35				99.1289
OG.354		Deception Island		Aphyric andesite; N Mount Pond		60.6		3			54.22	1.88	15.61	13.6501		0.17	3.63	7.82	5	0.85	0.27				103.1
OG.226		Deception Island		glassy px-dacite		60.6		3			66.21	0.62	15.52	6.68045		0.17	0.63	2.4	6.87	1.71	0.21				101.02
B.111.4		Deception Island		oligocl.andesite		60.6		3			67.4	0.6	15.41	6.6009		0.13	0.36	1.88	7.27	1.99	0.21				101.851
B.103.3		Deception Island		Ol-basalt; Collins Point		60.6		5			52.33	1.56	16.64	9.33		0.17	5.19	9.97	4.57	0.4	0.26				100.42								101		19		73		5	427	27	172	3					79	8
B.103.4		Deception Island				60.6		5																																								76
B.213.3		Deception Island		Ol-basalt; Crater Lake		60.6		5			52.71	1.68	16.12	9.96		0.18	4.92	9.09	4.9	0.45	0.29				100.3								52		15		80		5.2	383	33	190	7					99	10
B.119.1		Deception Island		basalt		60.6		5			52.46	2.44	15.12	12.16		0.21	4.08	8.37	5.09	0.48	0.33				100.74								20		9		87		5.6	357	38	214	6					89	12
B.311.1		Deception Island		basaltic andesite		60.6		5			54.6	2.46	14.27	11.81		0.21	3.89	6.92	5.08	0.6	0.3				100.14								28		10		100		9.2	380	39	252	6					138	12
B.202.1		Deception Island		basaltic andesite		60.6		5			54.79	2.1	16	9.06		0.21	4.05	7.24	5.38	0.66	0.27				99.76								20		7		96		10	369	43	270	7					126	15
B.428.1		Deception Island		andesite		60.6		5			57.5	2.16	14.83	8.66		0.21	3.19	5.94	5.71	0.78	0.29				99.27								13		4		103		13	337	45	325	11					161	21
B.184.1		Deception Island		andesite		60.6		5			61.91	1.26	15.32	7.25		0.21	1.35	3.57	6.7	1.21	0.41				99.19								9		3		123		20	255	66	457	13					199	25
B.107.8		Deception Island		dacite		60.6		5			62.57	1.21	15.26	7.17		0.22	1.24	3.63	6.44	1.21	0.3				99.25								9		4		123		21	260	66	496	14					200	28
B.111.3		Deception Island		dacite		60.6		5			67.39	0.63	14.73	5.27		0.19	0.49	1.87	7.35	1.58	0.11				99.61								6		3		134		31	141	72	632	14					230	30
B.317.1		Deception Island		rhyodacite		60.6		5			70.1	0.5	14.31	4.32		0.13	0.9	3.46	4.88	0.65	0.08				99.33								20		6		101		14	117	36	178						68	10
B.138.2		Deception Island		Deception Island		60.6		5,6			51.89	1.49	16.2	9.46		0.18	6.11	10.07	4.07	0.28	0.21				99.96								141		35		76	16	3	340	26	144	2					80	8
P.870.1		Deception Island		rhyodacite		60.6		5,6			68.02	0.55	14.99	4.97		0.18	0.33	1.69	7.45	1.69	0.1				99.97								7		2		124	27	32	134	71	665	17					251	28
DI-01A		Deception Island			62.9564	60.6297		14			53.8423	1.90285	16.7873		9.29777	0.175631	4.59012	8.50141	3.9544	0.614171	0.334023				100						29	189		25		20	140	19	6	423	33	181	6					99	11
DI-01B		Deception Island			62.9564	60.6297		14			53.581	1.86129	16.7441		9.06894	0.1642	4.80717	8.73932	3.92135	0.788591	0.324079				100						27	278		25		20	140	19	7	389	30	171	6					91	11.1
DI-02		Deception Island			62.9564	60.6297		14			53.5499	1.87282	16.6728		9.19808	0.163995	4.70119	8.64801	4.26387	0.601315	0.32799				100						26	203		26		20	150	19	7	371	30	163	6					88	11.3
DI-04A		Deception Island			62.9564	60.6297		14			53.3289	1.86404	16.655		9.2009	0.166653	4.93786	9.03218	3.91943	0.576084	0.318904				100						31	267	50	31		60	150	20	6	401	31	164	6					92	11.3
DI-04B		Deception Island			62.9564	60.6297		14			51.1018	1.60032	18.0914		8.67233	0.153607	5.84308	10.1099	3.76487	0.401586	0.261031				100						34	250	120	32		30	130	19	4	519	26	141	6					82	9.8
DI-05A		Deception Island			62.9564	60.6297		14			54.2547	1.89428	17.0016		9.25341	0.169035	4.27494	8.65894	3.51156	0.719761	0.261731				100						29	162	20	26		30	140	18	7	423	31	166	6					94	10.9
DI-05B		Deception Island			62.9564	60.6297		14			53.8105	1.80654	16.949		9.15042	0.16746	4.25247	8.70792	4.30321	0.5582	0.294324				100						31	271		28		30	150	21	6	458	32	169	6					97	11.2
DI-06		Deception Island			62.9564	60.6297		14			52.5408	1.8573	16.6661		9.47076	0.170216	5.07417	9.37267	4.02917	0.517113	0.301649				100						28	228	50	34		30	110	18	6	389	28	143	5					79	11
DI-07		Deception Island			62.9564	60.6297		14			53.6091	1.81886	16.4519		9.17027	0.168471	4.82534	8.87072	4.26377	0.530371	0.291184				100						34	252	40	35		40	110	19	6	361	30	190	5					83	11.5
DI-08A		Deception Island			62.9564	60.6297		14			55.3801	1.69496	16.6332		7.89	0.163847	4.599	6.59906	6.13577	0.644086	0.259895				100						28	187	40	26		60	80	17	7	279	29	193	5					88	11.2
DI-08B		Deception Island			62.9564	60.6297		14			54.9269	2.41658	15.7093		10.3579	0.192193	3.13579	6.86839	5.20945	0.79912	0.384387				100						27	309		25		30	180	21	9	355	47	258	6					136	14
DI-09A		Deception Island			62.9564	60.6297		14			55.3923	1.74001	17.0541		8.38566	0.161835	3.92869	6.84172	5.53588	0.669663	0.290187				100						26	219	30	23		50	130	18	8	374	32	189	5					98	10.8
DI-09B		Deception Island			62.9564	60.6297		14			52.376	1.63162	16.7574		8.30094	0.133403	5.61318	10.703	3.90973	0.359161	0.215497				100						35	276	180	30		50	120	18	4	321	27	137	3					66	7.7
DI-10		Deception Island			62.9564	60.6297		14			50.649	1.51076	17.9124		8.35492	0.146823	6.47035	10.6118	3.6959	0.394904	0.253144				100						31	247	120	32		30	120	19	4	472	23	128	5					74	9.7
DI-11		Deception Island			62.9564	60.6297		14			53.1218	2.60315	15.493		10.8397	0.19179	4.0156	8.07115	4.66489	0.559387	0.439518				100						31	349	20	33		50	170	21	8	370	40	196	7					95	13.2
DI-12B		Deception Island			62.9564	60.6297		14			68.6716	0.761312	14.7248		4.34588	0.148374	0.736753	2.04654	6.54892	1.83165	0.184188				100						10	10		2			110	23	31	141	60	505	14					265	24.6
DI-13A		Deception Island			62.9564	60.6297		14			53.695	1.82909	16.1085		8.89407	0.177829	6.88219	4.03001	6.48959	1.60508	0.288683				100						33	196	30	28		80	110	17	8	313	26	128	4					67	9.5
DI-13B		Deception Island			62.9564	60.6297		14			68.0861	0.754439	15.1039		4.17471	0.145744	0.640466	1.80541	7.30232	1.80036	0.186592				100						9.5	10		2.5		170	430	21.5	30.5	152.5	65.5	513	13.5					291.5	25.2
DI-13C		Deception Island			62.9564	60.6297		14			50.572	1.64994	17.6034		8.66025	0.157567	6.23243	10.558	3.8338	0.461662	0.270975				100						32	249	120	31		30	60	18	4	494	24	143	6					79	9.9
DI-14		Deception Island			62.9564	60.6297		14			53.3642	2.01394	16.5536		10.1768	0.185758	5.5257	7.72423	3.35069	0.799463	0.305677				100						29	183	50	34		60	50	16	5	338	29	133	4					67	10.9
DI-15A		Deception Island			62.9564	60.6297		14			52.945	1.99867	16.076		9.90693	0.181697	5.114	8.44713	4.47626	0.553516	0.300824				100						32	248	40	29		60	110	15	4	302	29	177	4					65	8.8
DI-15B		Deception Island			62.9564	60.6297		14			52.5288	2.03595	16.0523		10.3448	0.179198	5.05209	8.7656	4.27485	0.442598	0.323852				100						30	291	40	51		60	40	16	4	346	29	121	4					73	10.5
DI-16A		Deception Island			62.9564	60.6297		14			52.3309	1.72097	16.767		8.76269	0.164108	5.38748	10.03	4.03791	0.496641	0.302303				100						32	234	70	32		60	140	19	5	409	28	146	4					74	10.6
DI-16B		Deception Island			62.9564	60.6297		14			56.5977	2.35089	15.7227		8.58394	0.190396	3.367	6.70394	5.18077	0.911896	0.390813				100						26	241		44		20	110	18	13	317	47	268	8					147	15.4
DI-17		Deception Island			62.9564	60.6297		14			55.0962	1.88924	16.4151		8.96184	0.175228	4.01817	7.8752	4.59219	0.654589	0.322259				100						27	264	50	29		50	180	21	8	368	37	230	7					109	14.4
DI-18		Deception Island			62.9564	60.6297		14			55.6951	1.86905	16.0859		8.93528	0.29099	3.48985	7.25441	5.07707	0.946227	0.356107				100						23	266	30	33		40	180	22	17	364	38	230	9					126	17.7
DI-19		Deception Island			62.9564	60.6297		14			51.2543	1.18784	19.43		6.94259	0.125468	6.71899	10.7879	3.01358	0.328328	0.211068				100						21	146	150	26		40	90	15	3	403	16	88	4					65	6.6
DI-20A		Deception Island			62.9564	60.6297		14			53.0454	2.41982	15.5108		11.32	0.194662	4.27636	8.36633	3.82076	0.652325	0.393466				100						33	349	40	42		40	110	20	8	364	36	186	6					125	14.6
DI-20B		Deception Island			62.9564	60.6297		14			54.3982	2.59765	16.1003		9.54377	0.211707	4.09654	8.12957	3.91659	0.698635	0.306976				100						34	333	50	32		50	80	16	7	366	38	191	5					132	13.1
DI-21		Deception Island			62.9564	60.6297		14			53.7062	1.21135	17.5276		7.34844	0.138642	6.25409	10.1199	3.13716	0.333956	0.222637				100						28	225	110	28		50	110	18	4	452	20	108	3					104	8.4
DI-22B		Deception Island			62.9564	60.6297		14			53.7145	1.80482	16.4307		8.88902	0.160724	4.88314	9.1111	4.16654	0.542571	0.296878				100						28	271	70	33		60	160	20	12	376	31	161	6					90	12.3
DI-23		Deception Island			62.9564	60.6297		14			55.8475	2.07439	15.7206		9.59831	0.17812	3.61243	7.35494	4.49302	0.770517	0.350235				100						27	298		26		60	160	20	11	354	38	234	7					128	13.7
SR-01		Sail Rock			63.0333	60.95		14			56.5267	1.06772	18.7524		6.46395	0.116101	3.81475	8.3966	3.93915	0.7049	0.21769				100						20	164	50	20	30	20	70	19	33	556	22	164	6					133	13.4
SR1		Sail Rock			63.0333	60.95		2			59	1.02	17.6		6.3	0.12	3.2	7	4.3	0.8	0.22				99.56						15	120	17		18	23	63	16	18	482	22	161	5.6				1.33	209	14.6
References:
Ref.#1: Roobol. M.J. (1979).Br.Anarct.Surv.Bull.49:137-156
Ref.#2: Keller. R.A. (1991). Earth Planet. Sci. Letts. 111: 287-303
Ref.#3: Baker. P.E. (1975). BAS. Sci.Rep.. 78: 81pp
Ref.#4: Smellie et al. (1992). J Volc. Geotherm. Res. 49: 255-267
Ref.#5: Weaver et al. (1979). Contrib. Mineral. Petrol. 68: 151-169
Ref.#7: Pallás et al. (2001): The Holocene
Ref.#8: Keller et al. (2002): J. Geophys. Res. 107
Ref.#9: Hole (1993): Chem. Geol.109
Ref.#10:Keller & Fisk (1992): Ophiolites...:155-169
Ref.#11: Marti et al 2013. Bull Volcanol75
Ref.#12: Fretzdorff et al. (2004). J Geophys. Res. 109,
Ref.#13: Petersen et al 2004. Mineral dep 39, 358-379
Ref.#14: Kraus et al 2013 Andean Geol. 40, 1-40
Ref.#15: Pancyk & Nawrocki 2011. Geol Quarterly 55, 335-344
[truncated: 25 more columns]
